# Supplementary material
Source: PubMed Central journal article supplement (PMC3079806)
Supplement: NIHMS275963-supplement-1_si_001.pdf [file NIHMS275963-supplement-1_si_001.pdf]

**Supplemental Table 1:** KEGG pathways containing mitochondrial proteins differentially regulated *in vivo* following APAP treatment compared to control.

| KEGG pathway                               | % <sup>a</sup> | p value <sup>b</sup> | Upregulated proteins                                                                                                                   |
|--------------------------------------------|----------------|----------------------|----------------------------------------------------------------------------------------------------------------------------------------|
| Parkinson's disease                        | 21             | 2.95E-08             | NDUFA4, UQCRC2, ATP5D, UQCRC1, SLC25A5, ATP5B, SDHA, UQCRH, LOC674583, COX6B1, COX6A1, ATP5O, ATP5A1, ATP5H, LOC100047429, ATP5J       |
| Huntington's disease                       | 22             | 1.27E-07             | NDUFA4, UQCRC2, ATP5D, UQCRC1, SLC25A5, ATP5B, SOD2, SDHA, UQCRH, LOC674583, COX6B1, COX6A1, ATP5O, ATP5A1, ATP5H, LOC100047429, ATP5J |
| Oxidative phosphorylation                  | 19             | 3.78E-07             | NDUFA4, UQCRC2, ATP5D, UQCRC1, ATP5B, SDHA, UQCRH, LOC674583, COX6B1, COX6A1, ATP5O, ATP5A1, ATP5H, LOC100047429, ATP5J                |
| Valine, leucine and isoleucine degradation | 13             | 2.65E-06             | ACAA2, ACADM, HMGCS2, IVD, DLD, ALDH2, ABAT, HADH, PCCA                                                                                |
| Alzheimer's disease                        | 19             | 1.83E-05             | NDUFA4, UQCRC2, ATP5D, UQCRC1, ATP5B, SDHA, UQCRH, LOC674583, COX6B1, COX6A1, ATP5O, ATP5A1, ATP5H, LOC100047429, ATP5J                |
| Fatty acid metabolism                      | 9              | 3.11E-02             | ACAA2, ACOX1, ACADM, ALDH2, ACADL, HADH                                                                                                |

<sup>a</sup> Indicates the percentage of genes identified experimentally from the total number of genes related to that KEGG term (only KEGG pathways with % > 1 were considered).

<sup>b</sup> p value < 0.05; includes FDR correction.

**Supplemental Table 2:** ETC proteins identified by DAVID to be differentially regulated *in vivo* following APAP treatment compared to control.

| Complex     | Protein | Description                                                              | APAP/CON Ratio <sup>a</sup> |
|-------------|---------|--------------------------------------------------------------------------|-----------------------------|
| I           | Ndufa4  | NADH dehydrogenase [ubiquinone] 1 alpha subcomplex subunit 4             | 1.79                        |
| II          | Sdha    | Succinate dehydrogenase [ubiquinone] flavoprotein subunit, mitochondrial | 2.21                        |
| III         | Uqcrc1  | Cytochrome b-c1 complex subunit 1, mitochondrial                         | 5.00                        |
| III         | Uqcrc2  | Cytochrome b-c1 complex subunit 2, mitochondrial                         | 2.75                        |
| III         | Uqcrh   | Cytochrome b-c1 complex subunit 6, mitochondrial                         | N.D. <sup>b</sup>           |
| IV          | Cox6a1  | Cytochrome c oxidase polypeptide VIa                                     | 1.87                        |
| IV          | Cox6b1  | Cytochrome c oxidase subunit VIb isoform 1                               | 4.32                        |
| V           | Atp5a1  | ATP synthase subunit alpha, mitochondrial                                | 1.36                        |
| V           | Atp5b   | ATP synthase subunit beta, mitochondrial                                 | 1.40                        |
| V           | Atp5d   | ATP synthase subunit delta, mitochondrial                                | 1.93                        |
| V           | Atp5h   | ATP synthase subunit d, mitochondrial                                    | N.D. <sup>b</sup>           |
| V           | Atp5j   | ATP synthase-coupling factor 6, mitochondrial (LOC674583)                | N.D. <sup>b</sup>           |
| V           | Atp5o   | ATP synthase subunit O, mitochondrial (LOC100047429)                     | 6.00                        |
| mPTP        | Slc25a5 | ADP/ATP translocase 2                                                    | 1.64                        |
| ROS defense | Sod2    | Superoxide dismutase [Mn], mitochondrial                                 | 2.15                        |

<sup>a</sup> Ratio of APAP-induced spectral counts over control spectral counts as described in reference 56; ratios greater than 1 represent upregulation, whereas ratios less than 1 represent downregulation

<sup>b</sup> Spectral count ratio could not be determined because no spectra were identified in control treatment.

**Supplemental Table 3:** KEGG pathways containing mitochondrial proteins differentially regulated *in vitro* following APAP treatment compared to control.

| <b>KEGG pathway</b>       | <b>%<sup>a</sup></b> | <b>p value<sup>b</sup></b> | <b>Proteins</b>                                                                                                      |
|---------------------------|----------------------|----------------------------|----------------------------------------------------------------------------------------------------------------------|
| Parkinson's disease       | 14                   | 5.86E-06                   | UQCRC2, ATP5E, SLC25A4, NDUFA8, SLC25A5, NDUFA9, NDUFA6, COX8A, VDAC1, NDUFV3, UBC, ATP5O, UBB, RPS27A, LOC100047429 |
| Huntington's disease      | 13                   | 1.58E-03                   | NDUFV3, UQCRC2, ATP5E, NDUFA8, SLC25A4, NDUFA9, SLC25A5, NDUFA6, COX8A, ATP5O, LOC100047429, VDAC1                   |
| Oxidative phosphorylation | 11                   | 8.36E-03                   | NDUFV3, UQCRC2, ATP5E, NDUFA8, NDUFA9, NDUFA6, COX8A, ATP5O, COX17, LOC100047429                                     |

<sup>a</sup> Indicates the percentage of genes identified experimentally from the total number of genes related to that KEGG term (only KEGG pathways with % > 1 were considered).

<sup>b</sup> p value < 0.05; includes FDR correction.

**Supplemental Table 4:** ETC proteins identified by DAVID to be differentially regulated *in vitro* following APAP treatment compared to control.

| <b>Complex</b> | <b>Protein</b> | <b>Description</b>                                                          | <b>APAP/CON Ratio<sup>a</sup></b> |
|----------------|----------------|-----------------------------------------------------------------------------|-----------------------------------|
| I              | Ndufa6         | NADH dehydrogenase [ubiquinone] 1 alpha subcomplex subunit 6                | N.D. <sup>b</sup>                 |
| I              | Ndufa8         | NADH dehydrogenase [ubiquinone] 1 alpha subcomplex subunit 8                | 1.07                              |
| I              | Ndufa9         | NADH dehydrogenase [ubiquinone] 1 alpha subcomplex subunit 9, mitochondrial | 5.00                              |
| I              | Ndufv3         | NADH dehydrogenase [ubiquinone] flavoprotein 3, mitochondrial               | N.D. <sup>b</sup>                 |
| III            | Uqcrc2         | Cytochrome b-c1 complex subunit 2, mitochondrial                            | 1.61                              |
| IV             | Cox8a          | Cytochrome c oxidase polypeptide 8A, mitochondrial                          | 1.09                              |
| V              | Atp5o          | ATP synthase subunit O, mitochondrial (LOC100047429)                        | 1.17                              |
| mPTP           | Slc25a4        | ADP/ATP translocase 1                                                       | 1.51                              |
| mPTP           | Slc25a5        | ADP/ATP translocase 2                                                       | 1.33                              |
| mPTP           | Vdac1          | Isoform PI-VDAC1 of Voltage-dependent anion-selective channel protein 1     | 1.65                              |

<sup>a</sup> Ratio of APAP-induced spectral counts over control spectral counts as described in reference 56; ratios greater than 1 represent upregulation, whereas ratios less than 1 represent downregulation

<sup>b</sup> Spectral count ratio could not be determined because no spectra were identified in control treatment.

**Supplemental Table 5:** Peptide detection and sequence coverage for P450 isoforms and Mgst1 identified experimentally as differentially regulated in the drug metabolism KEGG pathway following 6 h APAP treatment compared to control *in vivo*.

| Murine protein | Sequence coverage | Unique peptides | Unique peptide sequences                                                                                                                                                                                                                          |
|----------------|-------------------|-----------------|---------------------------------------------------------------------------------------------------------------------------------------------------------------------------------------------------------------------------------------------------|
| Cyp1a2         | 22.4              | 7               | FKTFNDNFVLFQK<br>IGSTPVVLSGLNTIK<br>IHEELDTVVGR<br>KIHEELDTVVGR<br>KSEEMLNIVNNSKDFVENVTSGNAVDFFPVLR<br>LSDRPQLPYLEAFILEIYR<br>SFSIASDPTSASSCYLEEHVSK                                                                                              |
| Cyp2a5         | 2.8               | 1               | IQEEAGFLIDFRK                                                                                                                                                                                                                                     |
| Cyp2c54        | 9.8               | 5               | GTTVITSLSSVLR<br>KPTVVLHGVEAVK<br>SIEDRVQEEAR<br>VQEEIEHVIGK<br>YAILLLLK                                                                                                                                                                          |
| Cyp2e1         | 32.3              | 11              | DIDLSPVTIGFGSIPR<br>DVTDCLLIEMEKEK<br>EAHFLVEELKK<br>FGPVFTLHLGQR<br>FSLSILR<br>GQFPDPTFLIGCAPCNVIADILFNKR<br>GTVVIPTLDSLLFDNYEFPDPETFKPEHFLNENGGK<br>SLDINCPR<br>SLVDPKDIDLSPVTIGFGSIPR<br>TKGQFPDPTFLIGCAPCNVIADILFNK<br>YGLLILMKYPEIEEKLHEEIDR |
| Cyp3a11        | 33.1              | 9               | AISISKDDEWKR<br>GSIDPYVYLPFGNGPR<br>GSTVMIPSYALHHDHPQHWSEPEEFQPER<br>LKEMFPVIEQYGDILVK<br>LQDEIDEALPNKAPPTYDTVMEMEYLDMVLNETLR<br>QGILQPEKPIVLK<br>QGIPGPKPLPFLGTVLNYYK<br>QGLLQPEKPIVLK<br>TWGLFDGQTPLLAVTDPETIKNVLVK                             |
| Cyp2d9         | 18.1              | 7               | DIEVQDFLIPK<br>FGDIVPVNLPR<br>FHPEHFLDAQGHFVKPEAFMPFSAGR<br>ITSHDIEVQDFLIPK<br>NLTDAFLAEIEK<br>SFIAILDNLLTENR<br>STCNVIASLIFAR                                                                                                                    |
| Mgst1          | 54.9              | 7               | ITNKVFANPEDCAGFGK<br>ITNKVFANPEDCAGFGKGENAK<br>MMFMSSATAFQR<br>QLMDNEVLMAFTSYATIILTK<br>VFANPEDCAGFGK<br>VFANPEDCAGFGKGENAK<br>VFANPEDCAGFGKGENAKK                                                                                                |
